# Supplementary material for: Composition and Similarity of Bovine Rumen Microbiota across Individual Animals
Source: PubMed Central journal article supplement (PMC3303817; doi:10.1371/journal.pone.0033306), 2012-03-14
Supplement: pone.0033306.s006.pdf [file pone.0033306.s006.pdf]

**Table S5. Formulated ingredients (g/kg DM) of the basic total mixed rations.**

| Ration composition of 30% fiber diet of the 16 lactating<br>COWS |     | Ration composition of 50% fiber diet of one dairy cow |     |
|------------------------------------------------------------------|-----|-------------------------------------------------------|-----|
| Wheat silage                                                     | 100 | Bran                                                  | 93  |
| Oat hay                                                          | 80  | Soy molassa                                           | 100 |
| Wheat straw                                                      | -   | Straw                                                 | 100 |
| Sunflower straw                                                  | -   | Hay                                                   | 269 |
| Corn silage                                                      | 100 | Sunflower shell                                       | 77  |
| Clover hay                                                       | 23  | lactose                                               | 24  |
| Soybean hulls                                                    | 78  | F gluten                                              | 54  |
| Soybean meal (solvent extracted)                                 | 22  | growth mix                                            | 39  |
| Ground corn grain                                                | 129 | Pima cotton                                           | 77  |
| Ground barley grain                                              | 87  | corn sillage                                          | 77  |
| Ground wheat grain                                               | 44  | water                                                 | 34  |
| Whole cottonseeds                                                | 20  | Sunflower hulls                                       | 56  |
| Corn gluten Feed                                                 | 96  |                                                       |     |
| Corn distillers dry grain                                        | 89  |                                                       |     |
| Rapeseed meal                                                    | 38  |                                                       |     |
| Whey solids                                                      | 36  |                                                       |     |
| NaHCO <sub>3</sub>                                               | 7.4 |                                                       |     |
| NaCl                                                             | 6   |                                                       |     |
| CaCO <sub>3</sub>                                                | 9   |                                                       |     |
| <sup>2</sup> Ca-LCFA                                             | 14  |                                                       |     |
| Soy molassa                                                      | 17  |                                                       |     |
| Urea                                                             | 4   |                                                       |     |
| Trace mineral + vitamin mixture <sup>1</sup>                     | 0.6 |                                                       |     |

<sup>1</sup>The trace minerals + vitamins mix contained (g/ kg DM): Zn, 24; Fe, 24; Cu, 12.8; Mn, 24; I, 1.44; Co, 0.32; Se, 0.32; Vit. A 16,000,000 IU; Vit. D<sub>3</sub>, 3,200,000 IU; Vitamin E, 48,000 IU.

<sup>2</sup> Calcium salts of long-chain fatty acids
