# Supplementary material for: Composition and Similarity of Bovine Rumen Microbiota across Individual Animals
Source: PLOS journal article supplement (doi:10.1371/journal.pone.0033306), 2012-03-14
Supplement: S2 (10.1371/journal.pone.0033306.s002) [file journal.pone.0033306.s002]

**Table S1. Comparison of different clustering methods and number of OTUs generated by each method.**

|                                                        | UCLUST | CD_HIT | ESPRIT-tree |
|--------------------------------------------------------|--------|--------|-------------|
| Total raw OTU number                                   | 16094  | 18356  | 20344       |
| Total number of chimeric OTUs identified               | 2929   | 3047   | 2420        |
| Total OTU number after singleton and doubleton removal | 4986   | 6222   | 4861        |
