# Supplementary material for: Composition and Similarity of Bovine Rumen Microbiota across Individual Animals
Source: PLOS journal article supplement (doi:10.1371/journal.pone.0033306), 2012-03-14
Supplement: S4 (10.1371/journal.pone.0033306.s004) [file journal.pone.0033306.s004]

**Table S3. identification of the core OTUs found in 100% of the samples**

| Taxonomic identification                                   | Number of core OTUs (97% similarity)<br>associated with a specific taxonomic<br>identification |
|------------------------------------------------------------|------------------------------------------------------------------------------------------------|
| (Order) <i>Bacteroidales</i> sp.                           | 1                                                                                              |
| (Genus) <i>Prevotella</i> sp.                              | 80                                                                                             |
| (Order) <i>Clostridiales</i> sp.                           | 8                                                                                              |
| (Family) <i>Clostridiales</i> FamilyXIII.IncertaeSedis sp. | 7                                                                                              |
| (Family) <i>Lachnospiraceae</i> sp.                        | 14                                                                                             |
| (Genus) <i>Butyrivibrio</i> sp.                            | 16                                                                                             |
| (Genus) <i>Coprococcus</i> sp.                             | 1                                                                                              |
| (Genus) <i>Eubacterium</i> sp.                             | 2                                                                                              |
| (Genus) <i>Lachnobacterium</i> sp.                         | 1                                                                                              |
| (Genus) <i>Lachnospira</i> sp.                             | 1                                                                                              |
| (Genus) <i>Moryella</i> sp.                                | 1                                                                                              |
| (Genus) <i>Shuttleworthia</i> sp.                          | 4                                                                                              |
| (Family) <i>Ruminococcaceae</i> sp.                        | 10                                                                                             |
| (Genus) <i>Ruminococcus</i> sp.                            | 4                                                                                              |
| (Family) <i>Veillonellaceae</i> sp.                        | 4                                                                                              |
| (Order) <i>Aeromonadales</i> sp.                           | 1                                                                                              |
| (Family) <i>F16</i> sp.                                    | 1                                                                                              |
| (Family) <i>Coriobacteriaceae</i> sp.                      | 1                                                                                              |
| Total                                                      | 157                                                                                            |
